# Supplementary material for: Factors affecting the selectivity of the photocatalytic conversion of nitroaromatic compounds over TiO2 to valuable nitrogen-containing organic compounds
Source: Royal Society of Chemistry journal article supplement (doi:10.1039/c2cp44153e), 2013-01-01
Supplement: c2cp44153e.pdf [file c2cp44153e.pdf]

## **Supporting Information**

### **Factors Affecting the Selectivity of the Photocatalytic Conversion of Nitroaromatic Compounds over $\text{TiO}_2$ to Valuable Nitrogen-Containing Organic Compounds**

Amer Hakki, Ralf Dillert, Detlef Bahnemann\*

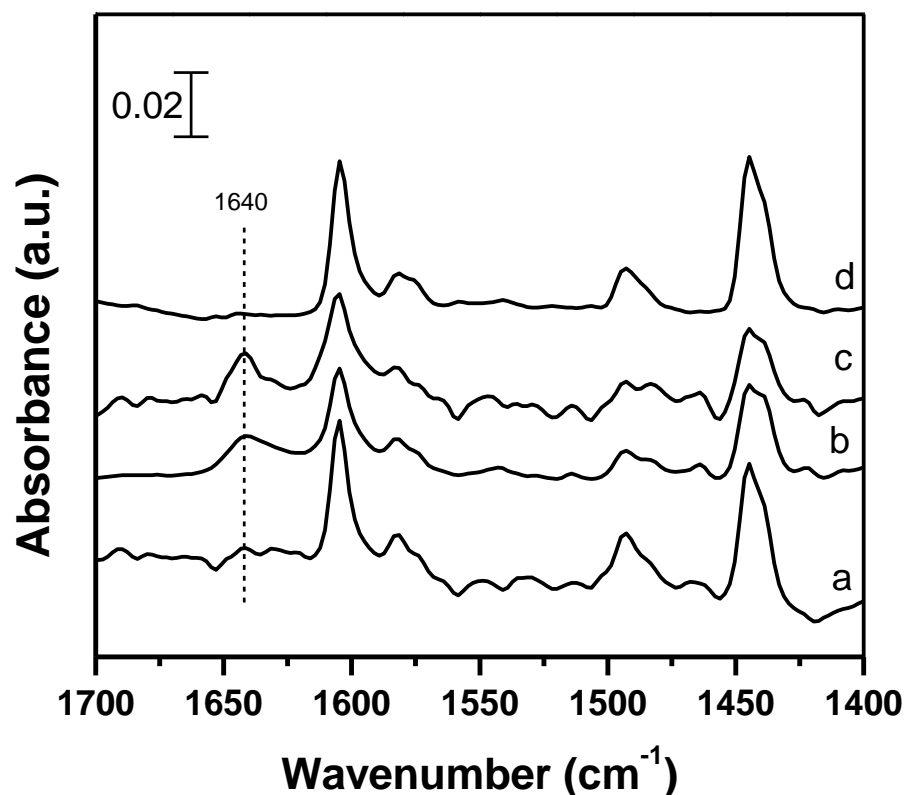

**Figure S1:** ATR-FTIR spectra of pyridine adsorption on P25 in the dark (a), after 5 min UV(A) irradiation (b), after 15 min UV(A) irradiation (c), and on (0.5 wt.%) Pt/P25 in the dark (d).

### ***In situ* ATR-FTIR investigation**

In-situ ATR-FTIR spectra of 1 ml pyridine dissolved in acetonitrile (100 mM) were recorded with a Bruker IFS 66 instrument equipped horizontal ATR unit with a ZnSe crystal. A TiO<sub>2</sub> layer was firstly prepared by placing 400 µL of a TiO<sub>2</sub> suspended in acetonitrile (4g L<sup>-1</sup> TiO<sub>2</sub>) on the crystal surface and evaporation of the solvent at room temperature by the mean of a N<sub>2</sub> flow. For each measurement 64 scans were recorded. Irradiation was applied from the top with UV(A) light by a Philips CLEO lamp (2 mW/cm<sup>-2</sup>).
